# Supplementary material for: Impact of safety valves on thermal runaway characteristics of 21 700-size lithium-ion cells
Source: Royal Society of Chemistry journal article supplement (doi:10.1039/d3ra01374j), 2023-01-01
Supplement: d3ra01374j1.pdf [file d3ra01374j1.pdf]

To complete the repeatability analysis of this work, Figs. S1-S5 illustrate the repetitive results correspondingly. As can be seen, the repeated results showed relatively good consistency with differences laid within the allowable range of error. Therefore, it can be concluded that the precision of this work is reliable.

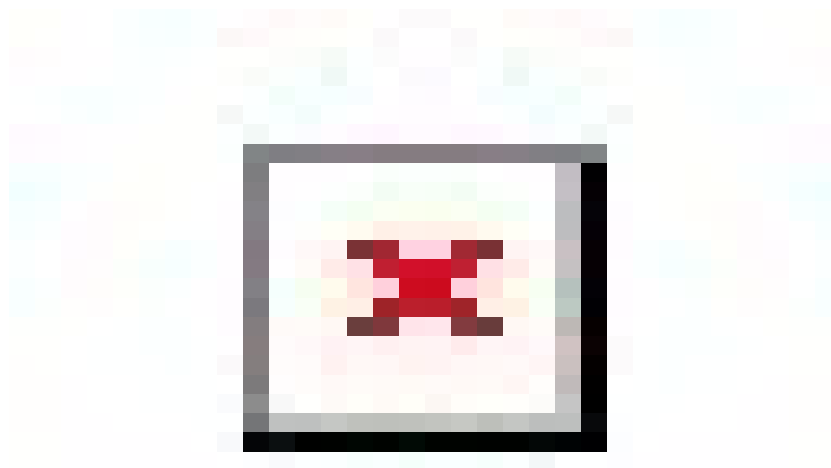

Fig. S1. The repeated results of surface temperature curves for Fig. 2 in the main text

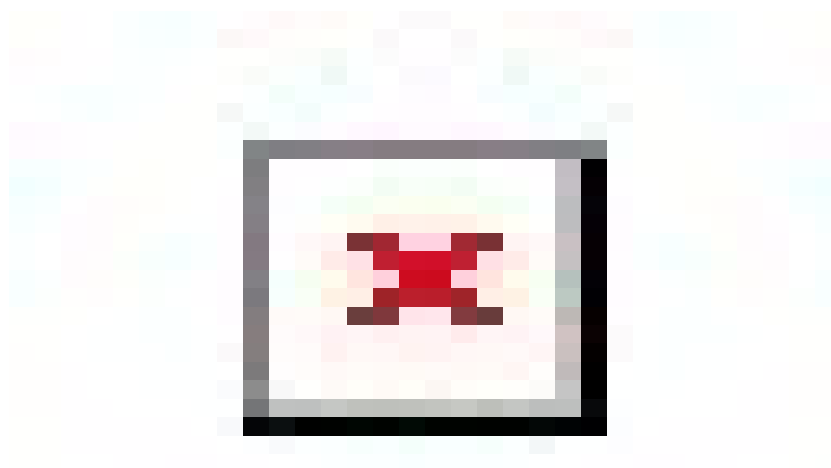

Fig. S2. The repeated results for ARC testing

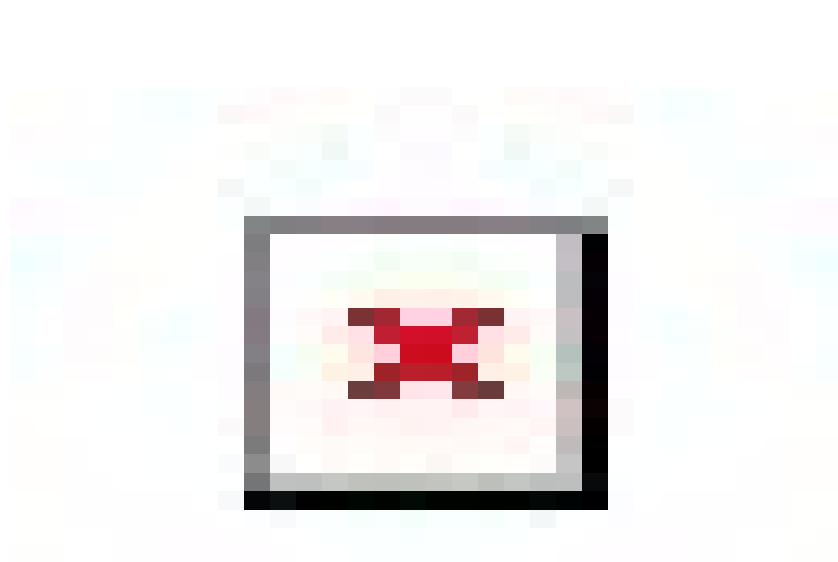

Fig. S3. The repeated results for overcharge testing

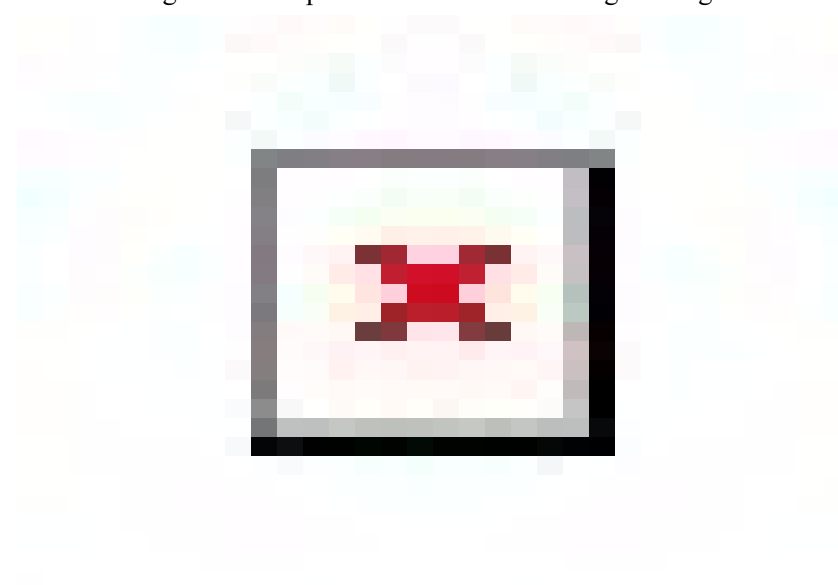

Fig. S4. The repeated results for cells with different SOCs in over-heating testing

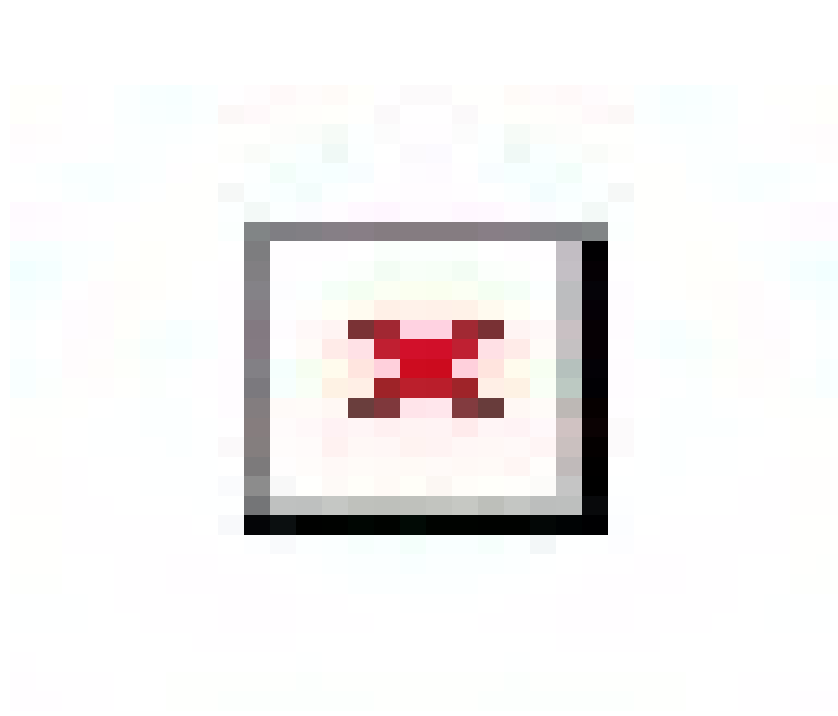

Fig. S5. The repeated results for cells with different SOHs in over-heating testing
